# Supplementary material for: Remote ablation chamber for high efficiency particle transfer in laser ablation electrospray ionization mass spectrometry
Source: Royal Society of Chemistry journal article supplement (doi:10.1039/d0an00984a), 2020-01-01
Supplement: d0an00984a1.pdf [file d0an00984a1.pdf]

## Electronic Supplementary Information

# Remote Ablation Chamber for High Efficiency Particle Transfer in Laser Ablation Electrospray Ionization Mass Spectrometry

Marjan Dolatmoradi,<sup>‡<sup>a</sup></sup> Jarod A. Fincher,<sup>‡<sup>a</sup></sup> Andrew R. Korte,<sup>a</sup> Nicholas J. Morris,<sup>b</sup>  
and Akos Vertes<sup>\*,<sup>a</sup></sup>

<sup>a</sup> *Department of Chemistry, The George Washington University, Washington, DC 20052, USA*

<sup>b</sup> *UES, Inc., Beavercreek, OH 45432, USA*

*\*Corresponding author*

*E-mail: [vertes@gwu.edu](mailto:vertes@gwu.edu), Phone: +1 (202) 994-2717, Fax: +1 (202) 994-5873.*

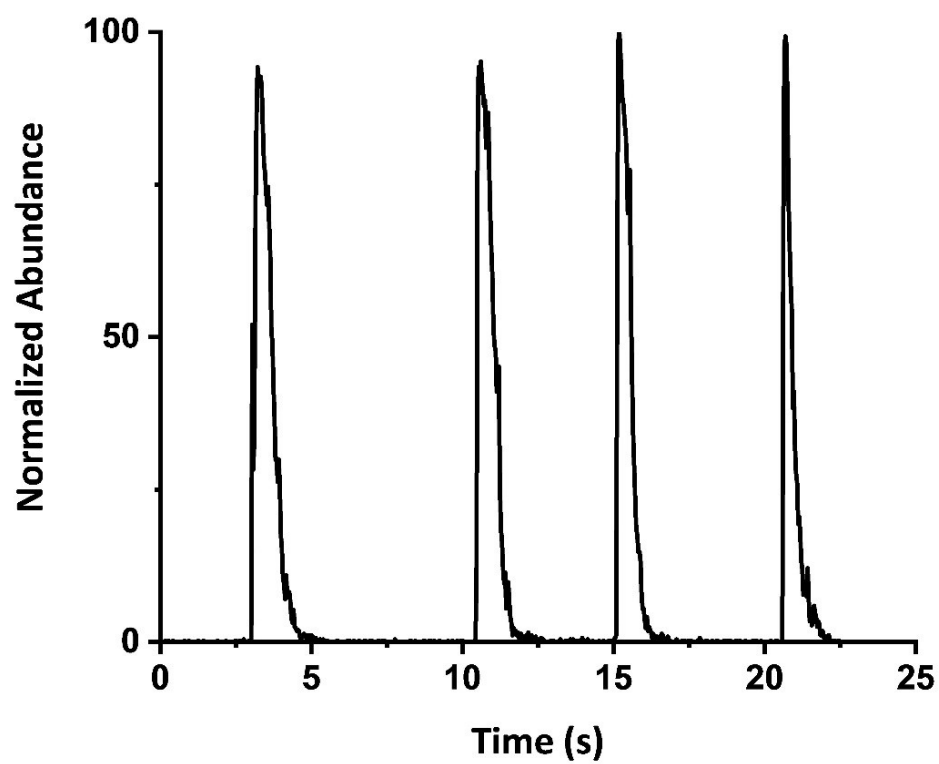

**Figure S1:** Temporal profile of verapamil signal for four single laser pulses impinging on tissue phantom in modified ablation chamber. No sample carryover is observed.

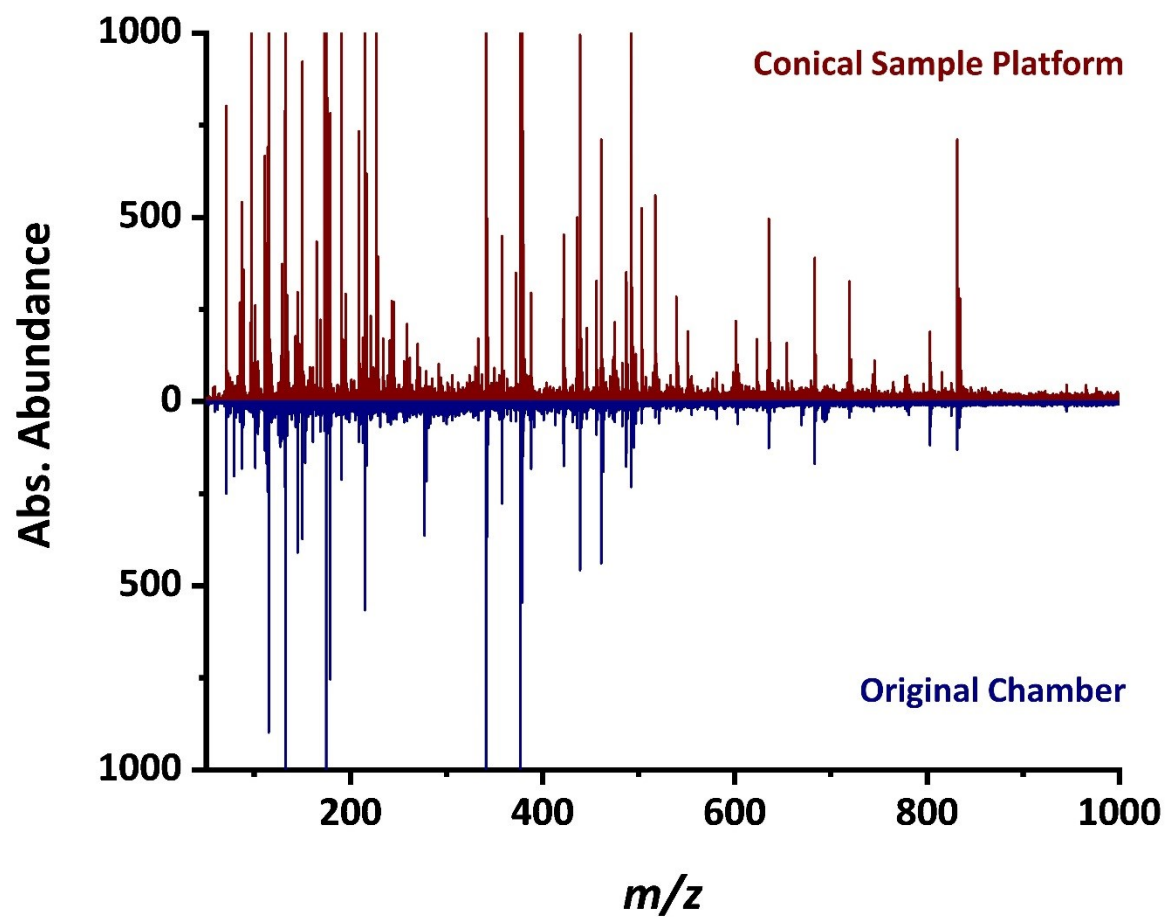

**Figure S2:** Zoomed-in views of mass spectra obtained from Brussels sprout (*B. oleracea*) stem sections using original and modified ablation chambers. After background subtraction, 129 and 106 peaks were detected for the modified and original chambers, respectively.

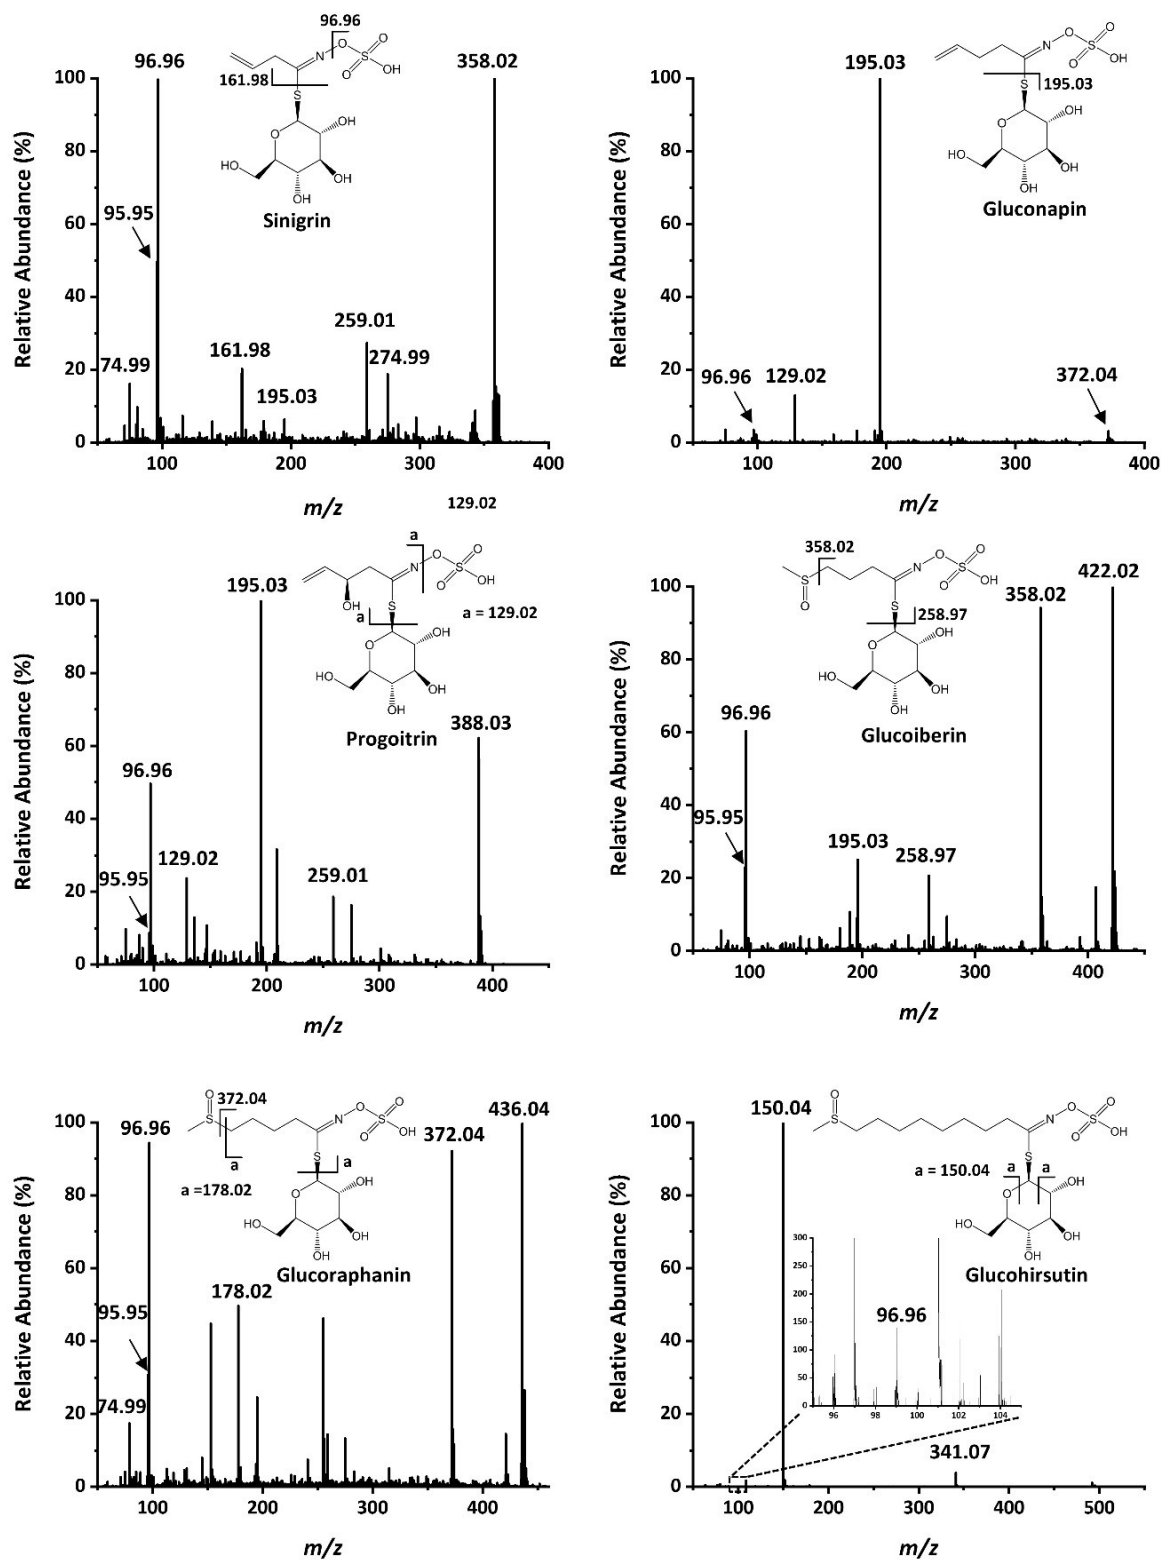

**Figure S3:** Tandem mass spectra for six glucosinolates from Brussels sprout (*B. oleracea*) stem sections.
